# Supplementary material
Source: MDPI journal article supplement (https://www.mdpi.com/2073-4352/2/2/182)
Supplement: s2 [file s2]

data_General
_audit_creation_date                    2012-02-06
_audit_creation_method                 'by CrystalStructure 4.0'
_audit_update_record                    ?

#==============================================================================
# PROCESSING SUMMARY (IUCr Office Use Only)

_journal_date_recd_electronic           ?
_journal_date_from_coeditor             ?
_journal_date_accepted                  ?
_journal_coeditor_code                  ?

#==============================================================================
# SUBMISSION DETAILS

_publ_contact_author_name              'Hiroki Akutsu'
_publ_contact_author_email             'akutsu@sci.u-hyogo.ac.jp'
_publ_contact_author_fax               '+81-791-58-0164'
_publ_contact_author_phone             '+81-791-58-0164'
_publ_contact_letter
;
    ENTER TEXT OF LETTER
;
_publ_requested_journal                'Crystals'
_publ_requested_category               'FO'
_publ_requested_coeditor_name           ?

#==============================================================================
# TITLE AND AUTHOR LIST

_publ_section_title
;
    ENTER SECTION TITLE
;
_publ_section_title_footnote
;
    ENTER FOOTNOTE TO TITLE OF PAPER
;
loop_
_publ_author_name
_publ_author_footnote
_publ_author_address
' FIRST AUTHORS NAME '
;
  FIRST AUTHORS FOOTNOTES
;
;
  FIRST AUTHORS ADDRESS
;
_publ_section_synopsis
;
    ENTER SYNOPSIS
;

#==============================================================================
# TEXT

_publ_section_abstract
;
    ENTER ABSTRACT
;
_publ_section_comment
;
    ENTER TEXT
;
_publ_section_references
;
    ENTER OTHER REFERENCES

    Rigaku (2010). CrystalStructure. Version 4.0. 
    Rigaku Corporation, Tokyo, Japan.

    M.C. Burla, R. Caliandro, M. Camalli, B. Carrozzini, 
    G.L. Cascarano, L. De Caro, C. Giacovazzo, G. Polidori, 
    D. Siliqi, R. Spagna (2007) 
    SIR2008

    Sheldrick, G.M. (2008), Acta Cryst. A64, 112-122.

    Rigaku (1999). NUMABS. 
    Rigaku Corporation, Tokyo, Japan.

;
_publ_section_figure_captions
;
    ENTER FIGURE CAPTIONS
;
_publ_section_exptl_prep
;
    ENTER COMPOUND PREPARATION DETAILS
;
_publ_section_exptl_refinement
;
    ENTER SPECIAL DETAILS OF THE REFINEMENT
;

#==============================================================================
data_V111022a

#==============================================================================
# CHEMICAL DATA

_chemical_formula_sum                  'C46 H42 N2 O9 S34'
_chemical_formula_moiety               '4(C10 H8 S8), C6 H4 N2 O6 S2, 3(H2 O)'
_chemical_formula_weight                1856.89
_chemical_melting_point                 ?

#==============================================================================
# CRYSTAL DATA
_symmetry_cell_setting                  triclinic
_symmetry_space_group_name_H-M         'P -1'
_symmetry_space_group_name_Hall        '-P 1'
_symmetry_Int_Tables_number             2
loop_
_symmetry_equiv_pos_site_id
_symmetry_equiv_pos_as_xyz
1   '+X,+Y,+Z'
2   '-X,-Y,-Z'
#------------------------------------------------------------------------------
_cell_length_a                          6.742(3)
_cell_length_b                          15.518(7)
_cell_length_c                          18.034(7)
_cell_angle_alpha                       74.29(3)
_cell_angle_beta                        82.16(4)
_cell_angle_gamma                       80.36(3)
_cell_volume                            1782.2(14)
_cell_formula_units_Z                   1
_cell_measurement_reflns_used           4124
_cell_measurement_theta_min             1.38
_cell_measurement_theta_max             30.10
_cell_measurement_temperature           294
#------------------------------------------------------------------------------
_exptl_crystal_description              needle
_exptl_crystal_colour                   black
_exptl_crystal_size_max                 0.650
_exptl_crystal_size_mid                 0.010
_exptl_crystal_size_min                 0.005
_exptl_crystal_density_diffrn           1.730
_exptl_crystal_density_meas             ?
_exptl_crystal_density_method          'not measured'
_exptl_crystal_F_000                    948.00
_exptl_absorpt_coefficient_mu           1.064
_exptl_absorpt_correction_type          numerical
_exptl_absorpt_process_details         'NUMABS (Rigaku, 1999)'
_exptl_absorpt_correction_T_min         0.770
_exptl_absorpt_correction_T_max         0.995

#==============================================================================
# EXPERIMENTAL DATA

_diffrn_ambient_temperature             294
_diffrn_radiation_type                 'Mo K\a'
_diffrn_radiation_wavelength            0.71075
_diffrn_measurement_device_type        'Rigaku Mercury70'
_diffrn_measurement_method              \w
_diffrn_detector_area_resol_mean        7.314
_diffrn_reflns_number                   13528
_diffrn_reflns_av_R_equivalents         0.0457
_diffrn_reflns_theta_max                27.50
_diffrn_reflns_theta_full               27.50
_diffrn_measured_fraction_theta_max     0.947
_diffrn_measured_fraction_theta_full    0.947
_diffrn_reflns_limit_h_min             -8
_diffrn_reflns_limit_h_max              8
_diffrn_reflns_limit_k_min             -20
_diffrn_reflns_limit_k_max              20
_diffrn_reflns_limit_l_min             -23
_diffrn_reflns_limit_l_max              17
_diffrn_standards_number                0
_diffrn_standards_interval_count        .
_diffrn_standards_decay_%               ?

#==============================================================================
# REFINEMENT DATA

_refine_special_details
;
    Refinement was performed using all reflections. The weighted 
    R-factor (wR) and goodness of fit (S) are based on F^2^.
    R-factor (gt) are based on F. The threshold expression of
    F^2^ > 2.0 sigma(F^2^) is used only for calculating R-factor (gt).
;
_reflns_number_total                    7764
_reflns_number_gt                 3650 
_reflns_threshold_expression            F^2^>2.5\s(F^2^)
_refine_ls_structure_factor_coef        F
_refine_ls_R_factor_gt            0.0806 
_refine_ls_wR_factor_ref          0.0565 
_refine_ls_number_restraints            0
_refine_ls_hydrogen_treatment           constr
_refine_ls_number_reflns          3129 
_refine_ls_number_parameters      424 
_refine_ls_goodness_of_fit_ref    1.1552 
_refine_ls_weighting_scheme       calc 
_refine_ls_weighting_details 
;
 Method, part 1, Chebychev polynomial, (Watkin, 1994, Prince, 1982) 
 [weight] = 1.0/[A~0~*T~0~(x)+A~1~*T~1~(x) ... +A~n-1~]*T~n-1~(x)] 
 where A~i~ are the Chebychev coefficients listed below and x= Fcalc/Fmax 
 Method = Robust Weighting (Prince, 1982) 
 W = [weight] * [1-(deltaF/6*sigmaF)^2^]^2^ 
 A~i~ are: 
 -0.212 -6.65 -2.39 -2.89 -1.09 
;
_atom_sites_solution_hydrogens          geom
_atom_sites_solution_primary            direct
_atom_sites_solution_secondary          difmap
_refine_ls_shift/su_max           0.0001543 
_refine_diff_density_min          -0.48 
_refine_diff_density_max          0.61 
_refine_ls_extinction_method            none
_refine_ls_extinction_coef              ?

loop_
_atom_type_symbol
_atom_type_scat_dispersion_real
_atom_type_scat_dispersion_imag
_atom_type_scat_Cromer_Mann_a1
_atom_type_scat_Cromer_Mann_b1
_atom_type_scat_Cromer_Mann_a2
_atom_type_scat_Cromer_Mann_b2
_atom_type_scat_Cromer_Mann_a3
_atom_type_scat_Cromer_Mann_b3
_atom_type_scat_Cromer_Mann_a4
_atom_type_scat_Cromer_Mann_b4
_atom_type_scat_Cromer_Mann_c
_atom_type_scat_source  
 C       0.0033   0.0016   2.3100  20.8439   1.0200  10.2075   1.5886   0.5687
   0.8650  51.6512   0.2156 'International Tables Vol C 4.2.6.8 and 6.1.1.4'
 H       0.0000   0.0000   0.4930  10.5109   0.3229  26.1257   0.1402   3.1424
   0.0408  57.7998   0.0030 'International Tables Vol C 4.2.6.8 and 6.1.1.4'
 N       0.0061   0.0033  12.2126   0.0057   3.1322   9.8933   2.0125  28.9975
   1.1663   0.5826 -11.5290 'International Tables Vol C 4.2.6.8 and 6.1.1.4'
 O       0.0106   0.0060   3.0485  13.2771   2.2868   5.7011   1.5463   0.3239
   0.8670  32.9089   0.2508 'International Tables Vol C 4.2.6.8 and 6.1.1.4'
 S       0.1246   0.1234   6.9053   1.4679   5.2034  22.2151   1.4379   0.2536
   1.5863  56.1720   0.8669 'International Tables Vol C 4.2.6.8 and 6.1.1.4'

#==============================================================================
# ATOMIC COORDINATES AND THERMAL PARAMETERS

loop_
_atom_site_label
_atom_site_type_symbol
_atom_site_fract_x
_atom_site_fract_y
_atom_site_fract_z
_atom_site_U_iso_or_equiv
_atom_site_occupancy
_atom_site_adp_type
_atom_site_refinement_flags_posn
_atom_site_refinement_flags_adp
_atom_site_refinement_flags_occupancy
_atom_site_disorder_assembly
_atom_site_disorder_group
_atom_site_attached_hydrogens
S1 S 0.6575(3) 0.4681(2) 0.28936(14) 0.0576 1.0000 Uani . . . . . . 
S2 S 1.1681(4) 0.4890(2) 0.23012(13) 0.0537 1.0000 Uani . . . . . . 
S3 S 0.7546(3) 0.47974(19) 0.44028(12) 0.0491 1.0000 Uani . . . . . . 
S4 S 1.1860(3) 0.4979(2) 0.39084(13) 0.0522 1.0000 Uani . . . . . . 
S5 S 0.2931(4) 0.7245(2) 0.23658(15) 0.0690 1.0000 Uani . . . . . . 
S6 S 0.8155(4) 0.7253(2) 0.18545(13) 0.0563 1.0000 Uani . . . . . . 
S7 S 0.3891(3) 0.7264(2) 0.38968(13) 0.0543 1.0000 Uani . . . . . . 
S8 S 0.8246(3) 0.72335(19) 0.34893(13) 0.0489 1.0000 Uani . . . . . . 
S9 S 0.4371(3) 0.74577(19) 0.55909(13) 0.0498 1.0000 Uani . . . . . . 
S10 S 0.8716(3) 0.74862(19) 0.51823(13) 0.0500 1.0000 Uani . . . . . . 
S11 S 0.4336(3) 0.7806(2) 0.71315(14) 0.0542 1.0000 Uani . . . . . . 
S12 S 0.9508(4) 0.7912(2) 0.65896(15) 0.0635 1.0000 Uani . . . . . . 
S13 S 0.5469(4) 0.9597(2) 0.23854(15) 0.0613 1.0000 Uani . . . . . . 
S14 S 1.0199(4) 0.9620(3) 0.29199(17) 0.0766 1.0000 Uani . . . . . . 
S15 S 0.3976(3) 0.9790(2) 0.39723(14) 0.0535 1.0000 Uani . . . . . . 
S16 S 0.7994(4) 0.9947(2) 0.43610(14) 0.0591 1.0000 Uani . . . . . . 
S17 S 1.0910(4) 0.71842(19) -0.04900(14) 0.0538 1.0000 Uani . . . . . . 
O1 O 1.2074(13) 0.7507(6) -0.1192(5) 0.1003 1.0000 Uani . . . . . . 
O2 O 1.1285(17) 0.7450(7) 0.0155(6) 0.1366 1.0000 Uani . . . . . . 
O3 O 0.8762(11) 0.7352(6) -0.0597(5) 0.0970 1.0000 Uani . . . . . . 
O4 O 1.071(6) 0.9296(15) 0.0215(12) 0.2768 0.5000 Uani . . . . . . 
O5 O 0.538(3) 0.8574(14) -0.0616(12) 0.1232 0.5000 Uani . . . . . . 
O6 O 0.366(6) 1.023(4) 0.039(2) 0.3742 0.5000 Uani . . . . . . 
N1 N 1.1381(11) 0.6033(6) -0.0267(5) 0.0598 1.0000 Uani . . . . . . 
C1 C 0.8150(15) 0.4311(8) 0.2120(6) 0.0641 1.0000 Uani . . . . . . 
C2 C 0.9757(14) 0.4873(8) 0.1731(5) 0.0630 1.0000 Uani . . . . . . 
C3 C 0.8398(12) 0.4788(7) 0.3442(4) 0.0433 1.0000 Uani . . . . . . 
C4 C 1.0363(12) 0.4881(6) 0.3213(4) 0.0354 1.0000 Uani . . . . . . 
C5 C 0.9874(13) 0.4961(7) 0.4647(5) 0.0435 1.0000 Uani . . . . . . 
C6 C 0.4389(17) 0.7047(11) 0.1517(6) 0.0935 1.0000 Uani . . . . . . 
C7 C 0.6135(15) 0.7545(10) 0.1238(6) 0.0792 1.0000 Uani . . . . . . 
C8 C 0.4798(13) 0.7218(7) 0.2957(5) 0.0448 1.0000 Uani . . . . . . 
C9 C 0.6815(13) 0.7243(7) 0.2748(5) 0.0485 1.0000 Uani . . . . . . 
C10 C 0.6206(13) 0.7302(6) 0.4179(5) 0.0407 1.0000 Uani . . . . . . 
C11 C 0.6406(12) 0.7395(6) 0.4906(5) 0.0397 1.0000 Uani . . . . . . 
C12 C 0.5727(12) 0.7675(6) 0.6254(5) 0.0406 1.0000 Uani . . . . . . 
C13 C 0.7718(13) 0.7706(7) 0.6068(5) 0.0460 1.0000 Uani . . . . . . 
C14 C 0.6356(14) 0.7542(8) 0.7749(5) 0.0580 1.0000 Uani . . . . . . 
C15 C 0.8037(13) 0.8085(7) 0.7464(5) 0.0544 1.0000 Uani . . . . . . 
C16 C 0.7568(18) 1.0091(11) 0.1779(6) 0.0975 1.0000 Uani . . . . . . 
C17 C 0.9527(18) 0.9685(12) 0.1994(6) 0.1073 1.0000 Uani . . . . . . 
C18 C 0.6031(13) 0.9671(6) 0.3289(5) 0.0438 1.0000 Uani . . . . . . 
C19 C 0.7866(13) 0.9736(6) 0.3452(5) 0.0493 1.0000 Uani . . . . . . 
C20 C 0.5420(13) 0.9947(6) 0.4644(5) 0.0457 1.0000 Uani . . . . . . 
C21 C 1.3154(14) 0.5600(8) -0.0148(5) 0.0556 1.0000 Uani . . . . . . 
C22 C 1.3262(15) 0.4610(7) 0.0021(6) 0.0602 1.0000 Uani . . . . . . 
C23 C 1.4983(14) 0.5980(7) -0.0161(5) 0.0507 1.0000 Uani . . . . . . 
H12 H 0.8774 0.3696 0.2323 0.1376 1.0000 Uiso R . . . . . 
H11 H 0.7290 0.4300 0.1734 0.0467 1.0000 Uiso R . . . . . 
H22 H 0.9126 0.5489 0.1535 0.1241 1.0000 Uiso R . . . . . 
H21 H 1.0388 0.4654 0.1288 0.1003 1.0000 Uiso R . . . . . 
H42 H 1.1757 0.9459 -0.0033 0.3198 0.5000 Uiso R . . . . . 
H41 H 1.0657 0.8775 0.0209 0.3198 0.5000 Uiso R . . . . . 
H51 H 0.6615 0.8540 -0.0714 0.1272 0.5000 Uiso R . . . . . 
H52 H 0.4885 0.9107 -0.0706 0.2939 0.5000 Uiso R . . . . . 
H62 H 0.4872 0.6405 0.1616 0.2714 1.0000 Uiso R . . . . . 
H61 H 0.3508 0.7195 0.1105 0.1592 1.0000 Uiso R . . . . . 
H641 H 0.4614 1.0315 0.0056 0.4103 0.5000 Uiso R . . . . . 
H63 H 0.3583 0.9686 0.0537 0.4103 0.5000 Uiso R . . . . . 
H72 H 0.5659 0.8186 0.1158 0.2950 1.0000 Uiso R . . . . . 
H71 H 0.6675 0.7443 0.0737 0.1392 1.0000 Uiso R . . . . . 
H142 H 0.5799 0.7645 0.8248 0.0818 1.0000 Uiso R . . . . . 
H141 H 0.6875 0.6905 0.7832 0.0809 1.0000 Uiso R . . . . . 
H151 H 0.8944 0.7945 0.7867 0.0562 1.0000 Uiso R . . . . . 
H152 H 0.7505 0.8721 0.7376 0.0876 1.0000 Uiso R . . . . . 
H162 H 0.7512 1.0002 0.1271 0.0508 1.0000 Uiso R . . . . . 
H161 H 0.7370 1.0738 0.1724 0.3467 1.0000 Uiso R . . . . . 
H172 H 1.0432 1.0060 0.1632 0.1782 1.0000 Uiso R . . . . . 
H171 H 0.9848 0.9087 0.1903 0.3091 1.0000 Uiso R . . . . . 
H221 H 1.2078 0.4368 0.0041 0.0655 1.0000 Uiso R . . . . . 
H231 H 1.4966 0.6601 -0.0256 0.1340 1.0000 Uiso R . . . . . 
loop_
_atom_site_aniso_label
_atom_site_aniso_U_11
_atom_site_aniso_U_22
_atom_site_aniso_U_33
_atom_site_aniso_U_23
_atom_site_aniso_U_13
_atom_site_aniso_U_12
S1 0.0407(12) 0.100(2) 0.0406(14) -0.0291(14) -0.0060(10) -0.0130(13) 
S2 0.0445(12) 0.088(2) 0.0352(13) -0.0268(13) 0.0046(10) -0.0146(13) 
S3 0.0389(12) 0.0802(19) 0.0331(12) -0.0213(12) 0.0003(9) -0.0135(12) 
S4 0.0372(12) 0.090(2) 0.0346(13) -0.0233(13) 0.0006(9) -0.0149(13) 
S5 0.0461(14) 0.127(3) 0.0446(15) -0.0371(16) -0.0069(11) -0.0160(16) 
S6 0.0469(13) 0.089(2) 0.0363(13) -0.0233(13) 0.0021(10) -0.0122(13) 
S7 0.0373(12) 0.090(2) 0.0397(13) -0.0237(13) -0.0003(9) -0.0118(13) 
S8 0.0372(11) 0.0758(18) 0.0358(12) -0.0188(12) -0.0032(9) -0.0066(12) 
S9 0.0376(11) 0.0839(19) 0.0346(12) -0.0248(12) -0.0010(9) -0.0126(12) 
S10 0.0332(11) 0.082(2) 0.0394(13) -0.0248(13) -0.0028(9) -0.0065(12) 
S11 0.0434(12) 0.086(2) 0.0422(13) -0.0301(13) 0.0020(10) -0.0158(13) 
S12 0.0433(13) 0.108(2) 0.0525(15) -0.0347(16) -0.0036(11) -0.0255(15) 
S13 0.0602(15) 0.083(2) 0.0492(15) -0.0285(14) -0.0062(12) -0.0147(15) 
S14 0.0456(14) 0.128(3) 0.0662(19) -0.0427(19) 0.0035(13) -0.0177(17) 
S15 0.0413(13) 0.0757(19) 0.0466(14) -0.0189(13) -0.0048(10) -0.0107(12) 
S16 0.0450(13) 0.091(2) 0.0476(14) -0.0226(14) -0.0012(11) -0.0198(14) 
S17 0.0429(13) 0.0727(19) 0.0433(13) -0.0124(13) -0.0041(10) -0.0046(12) 
O1 0.094(6) 0.094(7) 0.077(6) 0.009(5) 0.038(5) -0.001(5) 
O2 0.174(11) 0.128(9) 0.129(9) -0.074(7) -0.096(8) 0.055(8) 
O3 0.047(4) 0.110(7) 0.118(7) -0.004(6) -0.010(4) -0.005(5) 
O4 0.66(7) 0.076(16) 0.065(14) -0.038(12) 0.10(3) -0.05(3) 
O5 0.111(15) 0.119(17) 0.128(17) -0.022(14) -0.046(13) 0.030(13) 
O6 0.29(5) 0.55(8) 0.22(4) 0.20(5) -0.16(4) -0.24(6) 
N1 0.041(4) 0.085(7) 0.057(5) -0.018(5) -0.002(4) -0.018(4) 
C1 0.068(7) 0.091(9) 0.048(6) -0.039(6) 0.000(5) -0.021(6) 
C2 0.054(6) 0.107(9) 0.035(5) -0.029(6) 0.001(4) -0.017(6) 
C3 0.041(5) 0.068(7) 0.025(4) -0.020(4) 0.000(3) -0.010(5) 
C4 0.038(4) 0.045(5) 0.028(4) -0.015(4) -0.003(3) -0.009(4) 
C5 0.037(4) 0.060(6) 0.037(5) -0.018(4) -0.002(4) -0.006(4) 
C6 0.072(7) 0.186(15) 0.038(6) -0.048(8) -0.009(5) -0.025(9) 
C7 0.055(6) 0.152(12) 0.031(5) -0.021(6) -0.001(4) -0.021(7) 
C8 0.048(5) 0.061(6) 0.025(4) -0.009(4) -0.002(4) -0.008(5) 
C9 0.043(5) 0.068(7) 0.033(5) -0.008(4) -0.002(4) -0.013(5) 
C10 0.047(5) 0.051(6) 0.029(4) -0.014(4) -0.002(4) -0.015(4) 
C11 0.031(4) 0.041(5) 0.044(5) -0.008(4) -0.007(4) -0.001(4) 
C12 0.038(4) 0.046(6) 0.041(5) -0.017(4) 0.002(4) -0.010(4) 
C13 0.041(5) 0.062(7) 0.035(5) -0.010(4) -0.007(4) -0.007(5) 
C14 0.058(6) 0.078(8) 0.044(6) -0.019(5) -0.003(5) -0.023(6) 
C15 0.049(5) 0.078(8) 0.043(5) -0.027(5) -0.017(4) 0.003(5) 
C16 0.070(8) 0.174(15) 0.041(6) -0.015(8) -0.007(5) -0.012(9) 
C17 0.073(8) 0.215(18) 0.035(6) -0.037(8) 0.011(6) -0.028(10) 
C18 0.051(5) 0.043(6) 0.039(5) -0.009(4) -0.006(4) -0.012(4) 
C19 0.045(5) 0.049(6) 0.057(6) -0.018(5) 0.002(4) -0.012(4) 
C20 0.045(5) 0.046(6) 0.051(5) -0.016(5) -0.006(4) -0.011(4) 
C21 0.043(5) 0.088(9) 0.044(5) -0.025(5) 0.004(4) -0.023(5) 
C22 0.049(6) 0.071(8) 0.070(7) -0.027(6) -0.002(5) -0.023(6) 
C23 0.054(6) 0.053(6) 0.048(6) -0.013(5) -0.009(4) -0.010(5) 

#==============================================================================
_computing_data_collection             'CrystalClear (Rigaku Inc., 2008)'
_computing_cell_refinement              CrystalClear
_computing_data_reduction               CrystalClear
_computing_structure_solution          'Il Milione (Burla, et al., 2007)'
_computing_structure_refinement   'CRYSTALS (Betteridge et al., 2003)' 
_computing_publication_material   'CRYSTALS (Betteridge et al., 2003)' 
_computing_molecular_graphics          'CrystalStructure 4.0'

#==============================================================================
# MOLECULAR GEOMETRY

_geom_special_details
;
    ENTER SPECIAL DETAILS OF THE MOLECULAR GEOMETRY
;

loop_
 _geom_bond_atom_site_label_1
 _geom_bond_site_symmetry_1
 _geom_bond_atom_site_label_2
 _geom_bond_site_symmetry_2
 _geom_bond_distance
 _geom_bond_publ_flag
S1 . C1 . 1.797(9)    yes
S1 . C3 . 1.734(8)    yes
S2 . C2 . 1.770(9)    yes
S2 . C4 . 1.758(8)    yes
S3 . C3 . 1.753(8)    yes
S3 . C5 . 1.762(9)    yes
S4 . C4 . 1.764(8)    yes
S4 . C5 . 1.753(8)    yes
S5 . C6 . 1.774(11)    yes
S5 . C8 . 1.746(9)    yes
S6 . C7 . 1.797(10)    yes
S6 . C9 . 1.733(9)    yes
S7 . C8 . 1.737(8)    yes
S7 . C10 . 1.722(8)    yes
S8 . C9 . 1.748(9)    yes
S8 . C10 . 1.734(8)    yes
S9 . C11 . 1.724(8)    yes
S9 . C12 . 1.732(9)    yes
S10 . C11 . 1.737(8)    yes
S10 . C13 . 1.746(9)    yes
S11 . C12 . 1.769(8)    yes
S11 . C14 . 1.801(10)    yes
S12 . C13 . 1.745(9)    yes
S12 . C15 . 1.804(9)    yes
S13 . C16 . 1.810(12)    yes
S13 . C18 . 1.760(9)    yes
S14 . C17 . 1.761(11)    yes
S14 . C19 . 1.736(9)    yes
S15 . C18 . 1.744(9)    yes
S15 . C20 . 1.742(9)    yes
S16 . C19 . 1.773(10)    yes
S16 . C20 . 1.741(9)    yes
S17 . O1 . 1.409(7)    yes
S17 . O2 . 1.401(9)    yes
S17 . O3 . 1.457(7)    yes
S17 . N1 . 1.705(10)    yes
O4 . H42 . 0.820    no
O4 . H41 . 0.820    no
O5 . H51 . 0.820    no
O5 . H52 . 0.820    no
O6 . H641 . 0.820    no
O6 . H63 . 0.820    no
N1 . C21 . 1.284(12)    yes
C1 . C2 . 1.485(13)    yes
C1 . H12 . 0.970    no
C1 . H11 . 0.970    no
C2 . H22 . 0.970    no
C2 . H21 . 0.970    no
C3 . C4 . 1.352(11)    yes
C5 . C5 2_766 1.347(16)    yes
C6 . C7 . 1.473(15)    yes
C6 . H62 . 0.970    no
C6 . H61 . 0.970    no
C7 . H72 . 0.970    no
C7 . H71 . 0.970    no
C8 . C9 . 1.365(11)    yes
C10 . C11 . 1.383(11)    yes
C12 . C13 . 1.344(11)    yes
C14 . C15 . 1.478(12)    yes
C14 . H142 . 0.970    no
C14 . H141 . 0.970    no
C15 . H151 . 0.970    no
C15 . H152 . 0.970    no
C16 . C17 . 1.422(16)    yes
C16 . H162 . 0.970    no
C16 . H161 . 0.970    no
C17 . H172 . 0.970    no
C17 . H171 . 0.970    no
C18 . C19 . 1.336(12)    yes
C20 . C20 2_676 1.372(17)    yes
C21 . C22 . 1.474(15)    yes
C21 . C23 . 1.448(12)    yes
C22 . C23 2_865 1.377(13)    yes
C22 . H221 . 0.930    no
C23 . H231 . 0.930    no
loop_
 _geom_angle_atom_site_label_1
 _geom_angle_site_symmetry_1
 _geom_angle_atom_site_label_2
 _geom_angle_site_symmetry_2
 _geom_angle_atom_site_label_3
 _geom_angle_site_symmetry_3
 _geom_angle
 _geom_angle_publ_flag
C1 . S1 . C3 . 100.5(4)    yes
C2 . S2 . C4 . 103.1(4)    yes
C3 . S3 . C5 . 95.6(4)    yes
C4 . S4 . C5 . 95.1(4)    yes
C6 . S5 . C8 . 102.0(5)    yes
C7 . S6 . C9 . 101.0(4)    yes
C8 . S7 . C10 . 95.4(4)    yes
C9 . S8 . C10 . 95.8(4)    yes
C11 . S9 . C12 . 95.2(4)    yes
C11 . S10 . C13 . 95.1(4)    yes
C12 . S11 . C14 . 99.9(4)    yes
C13 . S12 . C15 . 103.0(4)    yes
C16 . S13 . C18 . 99.4(5)    yes
C17 . S14 . C19 . 102.6(5)    yes
C18 . S15 . C20 . 94.5(4)    yes
C19 . S16 . C20 . 94.7(4)    yes
O1 . S17 . O2 . 116.9(7)    yes
O1 . S17 . O3 . 111.0(5)    yes
O2 . S17 . O3 . 111.5(6)    yes
O1 . S17 . N1 . 107.2(5)    yes
O2 . S17 . N1 . 106.9(5)    yes
O3 . S17 . N1 . 102.1(5)    yes
H42 . O4 . H41 . 109.5    no
H51 . O5 . H52 . 109.5    no
H641 . O6 . H63 . 109.5    no
S17 . N1 . C21 . 122.3(7)    yes
S1 . C1 . C2 . 115.6(7)    yes
S1 . C1 . H12 . 108.3    no
C2 . C1 . H12 . 108.8    no
S1 . C1 . H11 . 108.2    no
C2 . C1 . H11 . 108.2    no
H12 . C1 . H11 . 107.5    no
C1 . C2 . S2 . 116.4(7)    yes
C1 . C2 . H22 . 108.4    no
S2 . C2 . H22 . 108.4    no
C1 . C2 . H21 . 107.9    no
S2 . C2 . H21 . 108.1    no
H22 . C2 . H21 . 107.3    no
S3 . C3 . S1 . 115.1(5)    yes
S3 . C3 . C4 . 116.9(6)    yes
S1 . C3 . C4 . 127.9(6)    yes
S4 . C4 . S2 . 114.3(4)    yes
S4 . C4 . C3 . 117.5(6)    yes
S2 . C4 . C3 . 128.2(6)    yes
S3 . C5 . S4 . 114.7(4)    yes
S3 . C5 . C5 2_766 122.7(9)    yes
S4 . C5 . C5 2_766 122.5(9)    yes
S5 . C6 . C7 . 116.5(9)    yes
S5 . C6 . H62 . 107.8    no
C7 . C6 . H62 . 108.4    no
S5 . C6 . H61 . 108.4    no
C7 . C6 . H61 . 108.1    no
H62 . C6 . H61 . 107.3    no
C6 . C7 . S6 . 115.9(8)    yes
C6 . C7 . H72 . 108.4    no
S6 . C7 . H72 . 108.6    no
C6 . C7 . H71 . 107.9    no
S6 . C7 . H71 . 108.3    no
H72 . C7 . H71 . 107.3    no
S5 . C8 . S7 . 114.5(5)    yes
S5 . C8 . C9 . 127.6(6)    yes
S7 . C8 . C9 . 117.7(6)    yes
S8 . C9 . S6 . 115.8(5)    yes
S8 . C9 . C8 . 115.3(6)    yes
S6 . C9 . C8 . 128.9(7)    yes
S8 . C10 . S7 . 115.5(5)    yes
S8 . C10 . C11 . 122.7(6)    yes
S7 . C10 . C11 . 121.8(6)    yes
S10 . C11 . S9 . 115.4(5)    yes
S10 . C11 . C10 . 122.2(6)    yes
S9 . C11 . C10 . 122.4(6)    yes
S11 . C12 . S9 . 115.9(5)    yes
S11 . C12 . C13 . 126.3(7)    yes
S9 . C12 . C13 . 117.8(6)    yes
S10 . C13 . S12 . 113.9(5)    yes
S10 . C13 . C12 . 116.2(6)    yes
S12 . C13 . C12 . 129.8(7)    yes
S11 . C14 . C15 . 115.0(7)    yes
S11 . C14 . H142 . 108.2    no
C15 . C14 . H142 . 107.4    no
S11 . C14 . H141 . 108.8    no
C15 . C14 . H141 . 109.6    no
H142 . C14 . H141 . 107.5    no
C14 . C15 . S12 . 115.9(7)    yes
C14 . C15 . H151 . 108.1    no
S12 . C15 . H151 . 107.9    no
C14 . C15 . H152 . 109.2    no
S12 . C15 . H152 . 108.2    no
H151 . C15 . H152 . 107.3    no
S13 . C16 . C17 . 115.9(10)    yes
S13 . C16 . H162 . 106.0    no
C17 . C16 . H162 . 105.6    no
S13 . C16 . H161 . 109.7    no
C17 . C16 . H161 . 111.9    no
H162 . C16 . H161 . 107.1    no
C16 . C17 . S14 . 120.5(9)    yes
C16 . C17 . H172 . 104.1    no
S14 . C17 . H172 . 105.6    no
C16 . C17 . H171 . 110.9    no
S14 . C17 . H171 . 108.1    no
H172 . C17 . H171 . 106.6    no
S13 . C18 . S15 . 116.4(5)    yes
S13 . C18 . C19 . 124.5(7)    yes
S15 . C18 . C19 . 118.7(7)    yes
S16 . C19 . S14 . 113.7(5)    yes
S16 . C19 . C18 . 116.1(7)    yes
S14 . C19 . C18 . 130.2(8)    yes
S15 . C20 . S16 . 116.0(5)    yes
S15 . C20 . C20 2_676 122.0(9)    yes
S16 . C20 . C20 2_676 122.1(9)    yes
N1 . C21 . C22 . 114.2(9)    yes
N1 . C21 . C23 . 127.1(10)    yes
C22 . C21 . C23 . 118.7(9)    yes
C21 . C22 . C23 2_865 123.7(9)    yes
C21 . C22 . H221 . 118.4    no
C23 2_865 C22 . H221 . 117.9    no
C21 . C23 . C22 2_865 117.7(9)    yes
C21 . C23 . H231 . 121.0    no
C22 2_865 C23 . H231 . 121.3    no
loop_
 _geom_hbond_atom_site_label_D
 _geom_hbond_site_symmetry_D
 _geom_hbond_atom_site_label_H
 _geom_hbond_site_symmetry_H
 _geom_hbond_atom_site_label_A
 _geom_hbond_site_symmetry_A
 _geom_hbond_angle_DHA
 _geom_hbond_distance_DH
 _geom_hbond_distance_HA
 _geom_hbond_distance_DA
 _geom_hbond_publ_flag
O4 . H42 . O6 1_655 121.9(13) 0.820 2.214 2.738(14)    yes
O4 . H41 . O2 . 165.7(12) 0.820 2.054 2.856(14)    yes
O5 . H51 . O3 . 127.8(7) 0.820 2.125 2.706(14)    yes
C6 . H61 . O2 1_455 175.6(5) 0.970 2.338 3.306(14)    yes
O6 . H641 . O6 2_675 140(3) 0.820 1.579 2.270(14)    yes
C14 . H142 . O1 1_456 123.6(3) 0.970 2.597 3.237(14)    yes
C22 . H221 . N1 2_765 167.2(3) 0.930 2.466 3.380(14)    yes


_iucr_refine_instruction_details_constraints
;
#
# Punched on 16/02/12 at 18:44:05
#
#LIST     12                                                                    
BLOCK SCALE X'S, U'S 
RIDE O   (   4,X'S) H   (  42,X'S) H   (  41,X'S) 
RIDE O   (   5,X'S) H   (  51,X'S) H   (  52,X'S) 
RIDE O   (   6,X'S) H   ( 641,X'S) H   (  63,X'S) 
RIDE C   (   1,X'S) H   (  12,X'S) H   (  11,X'S) 
RIDE C   (   2,X'S) H   (  22,X'S) H   (  21,X'S) 
RIDE C   (   6,X'S) H   (  62,X'S) H   (  61,X'S) 
RIDE C   (   7,X'S) H   (  72,X'S) H   (  71,X'S) 
RIDE C   (  14,X'S) H   ( 142,X'S) H   ( 141,X'S) 
RIDE C   (  15,X'S) H   ( 151,X'S) H   ( 152,X'S) 
RIDE C   (  16,X'S) H   ( 162,X'S) H   ( 161,X'S) 
RIDE C   (  17,X'S) H   ( 172,X'S) H   ( 171,X'S) 
RIDE C   (  22,X'S) H   ( 221,X'S) 
RIDE C   (  23,X'S) H   ( 231,X'S) 
END                                                                             
;


_iucr_refine_instruction_details_restraints
;
#
# Punched on 16/02/12 at 18:44:05
#
#LIST     16                                                                    
NO 
REM   HREST   START (DO NOT REMOVE THIS LINE) 
REM   HREST   END (DO NOT REMOVE THIS LINE) 
REM   SHIFTLIMIT   START (DO NOT REMOVE THIS LINE) 
REM   SHIFTLIMIT   END (DO NOT REMOVE THIS LINE) 
END                                                                             
;
#==============================================================================
# Additional structures and associated data_? identifiers
# should be added at this point if there is more than one 
# structure analysis in the CIF.

#==============================================================================
#     End of CIF
#==============================================================================
